# Supplementary material
Source: publisher figshare collection journal article supplement (https://sage.figshare.com/ndownloader/files/16250705)
Supplement: Supplementary file 1 [file 16250705]

Supplemental Table 1. *Summary of Findings Regarding Associations of Patient-Provider Language Concordance with Patient Behaviors, Provider Behaviors, Interpersonal Processes of Care, and Clinical Outcomes from Subanalysis of 90 Associations Excluding English-English Dyads*

|                                                       | Association in Favor of LC | Association Not in Favor of LC | No Association   | Total     |
|-------------------------------------------------------|----------------------------|--------------------------------|------------------|-----------|
|                                                       | <i>n</i> (%)               | <i>n</i> (%)                   | <i>n</i> (%)     | <i>n</i>  |
| <b>Patient behaviors (<i>k</i> = 5)<sup>a</sup></b>   | <b>2 (16.6)</b>            | <b>0 (0)</b>                   | <b>10 (83.3)</b> | <b>12</b> |
| Medication adherence ( <i>k</i> = 3)                  | 1                          | 0                              | 6                | 7         |
| Other adherence ( <i>k</i> = 3)                       | 1                          | 0                              | 4                | 5         |
|                                                       |                            |                                |                  |           |
| <b>Provider behaviors (<i>k</i> = 4)</b>              | <b>6 (46.2)</b>            | <b>0 (0)</b>                   | <b>7 (53.8)</b>  | <b>13</b> |
| Risk factor assessment ( <i>k</i> = 1)                | 1                          | 0                              | 1                | 2         |
| Provision of services ( <i>k</i> = 3)                 | 5                          | 0                              | 4                | 9         |
| Overutilization of resources ( <i>k</i> = 1)          | 0                          | 0                              | 2                | 2         |
|                                                       |                            |                                |                  |           |
| <b>Interpersonal processes of care (<i>k</i> = 8)</b> | <b>16 (51.6)</b>           | <b>0 (0)</b>                   | <b>15 (48.4)</b> | <b>31</b> |
| Interpersonal style ( <i>k</i> = 3)                   | 4                          | 0                              | 4                | 8         |
| Communication/information quality ( <i>k</i> = 5)     | 7                          | 0                              | 3                | 10        |
| Satisfaction ( <i>k</i> = 4)                          | 3                          | 0                              | 3                | 6         |
| Listening skills/feeling understood ( <i>k</i> = 1)   | 1                          | 0                              | 1                | 2         |
| Shared decision-making ( <i>k</i> = 2)                | 1                          | 0                              | 1                | 2         |
| Spending enough time with patient ( <i>k</i> = 2)     | 0                          | 0                              | 2                | 2         |
| Other interpersonal processes of care ( <i>k</i> = 1) | 0                          | 0                              | 1                | 1         |
|                                                       |                            |                                |                  |           |
| <b>Clinical outcomes (<i>k</i> = 10)</b>              | <b>7 (20.6)</b>            | <b>4 (11.8)</b>                | <b>23 (67.6)</b> | <b>34</b> |
| Assessments and procedures ( <i>k</i> = 5)            | 1                          | 3                              | 14               | 18        |
| Risk factor control ( <i>k</i> = 3)                   | 5                          | 0                              | 4                | 9         |
| ED visit/hospitalization ( <i>k</i> = 2)              | 1                          | 1                              | 3                | 5         |
| Other clinical outcomes ( <i>k</i> = 2)               | 0                          | 0                              | 2                | 2         |
|                                                       |                            |                                |                  |           |
| <b>All outcomes</b>                                   | <b>31 (34.4)</b>           | <b>4 (4.4)</b>                 | <b>55 (61.1)</b> | <b>90</b> |

Note. Total number of studies (*k*) = 20. LC = language concordance; ED = emergency department. <sup>a</sup>Number of studies examining subdomains (e.g., medication adherence) do not sum to the total number of studies for the global domain (e.g., patient behaviors) because several studies examined more than one subdomain (e.g., a study examining medication adherence and other adherence would be counted twice).
